# Supplementary material for: Patients’ perspectives on ethical principles to fairly allocate scarce surgical resources during the COVID-19 pandemic in the Netherlands: a Q-methodology study
Source: HighWire-hosted journal article supplement (doi:10.1136/bmjopen-2024-086681), 2024-09-01
Supplement: bmjopen-2024-086681supp001_data_supplement.pdf [file bmjopen-2024-086681supp001_data_supplement.pdf]

### Supplementary material 1: Participant instructions

These instructions will step-by-step guide you through this study's process. Please carefully read each step completely before you start carrying out the activity. Please fully complete each step before proceeding to the next one.

This study is about decision-making in healthcare. We are interested in your views on this topic. There is currently a lot of debate on how to allocate scarce surgical capacity. Due to the corona-crisis, choices have had to be made about to whom to provide care and to whom not to provide care.

The statements on the twenty numbered cards describe ways in which we think the capacity of operation theatres could be prioritized. The first part of your task is to rank these statements. In the second part, you will be asked to elaborate on the choices you made.

1. Open the link to the VQ-method website. The twenty cards you will find contain statements about how surgical capacity *could be* prioritized in times of scarcity. This study is about peoples' individual opinions; there are no right or wrong answers. The numbers on the cards (from 1 to 20) are to help you to complete the exercise and have no other meaning.

2. Read through the twenty statements carefully. Press 'next'.

3. Place each statement into one of three piles:

1. A pile (to your right) for statements with which you agree;
2. A pile (on your left) for statements with which you disagree;
3. A pile (in the middle) for statements with which you neither agree nor disagree, do not consider relevant or are unclear to you.

Press 'save and continue'.

4. Take the pile containing the statements you agree with (on your right) and read through them once again. Select the statement which you agree with the most strongly and place it in the extreme right column of the score sheet, below the "+4". Next, select the two statements with which you next most strongly agree and place them in the two spaces below the "+3". It does not matter in which order you place them. Proceed until all statements you agree with have been placed on the score sheet.

4. Next, take the pile containing the statements you disagree with (to your left) and read through them once again. Select the statement with which you disagree the most and place it in the extreme left column of the score sheet, below the “-4”. Next, select the two statements which you now disagree with most strongly and place them in the two spaces below the “-3”. Again, it does not matter which of them you place at the top. Proceed until all statements you disagree with have been placed on the score sheet.

5. Finally, take the remaining ‘undecided’ pile and read through these statements once again. Place these cards in the remaining spaces on the score sheet in what you feel are the appropriate places. Press ‘save and continue’.

6. You will now see the statement you most strongly agreed with, and the one you most strongly disagreed with. In a maximum of two sentences, explain why you agree/disagree most with these statements. Press 'finish'.

The score sheet used by patients to rank the statements.

[illegible]

Supplementary material 2: Correlation matrix

| Participants | 1   | 2   | 3   | 4   | 5   | 6   | 7   | 8   | 9   | 10  | 11  | 12  | 13  | 14  | 15  | 16  |
|--------------|-----|-----|-----|-----|-----|-----|-----|-----|-----|-----|-----|-----|-----|-----|-----|-----|
| 1            | 100 | 50  | 0   | 20  | 63  | 29  | 50  | -14 | 50  | 51  | 34  | 54  | 67  | 57  | 60  | 13  |
| 2            | 50  | 100 | 32  | 69  | 69  | 14  | 52  | 4   | 70  | 23  | 10  | 41  | 77  | 69  | 49  | 39  |
| 3            | 0   | 32  | 100 | 44  | 38  | 10  | 34  | 70  | 36  | -8  | 34  | -16 | 26  | 39  | 26  | 44  |
| 4            | 20  | 69  | 44  | 100 | 40  | 14  | 54  | 16  | 67  | -8  | -3  | 28  | 63  | 67  | 27  | 53  |
| 5            | 63  | 69  | 38  | 40  | 100 | 32  | 69  | 19  | 73  | 52  | 28  | 42  | 78  | 83  | 73  | 26  |
| 6            | 29  | 14  | 10  | 14  | 32  | 100 | 44  | 9   | 46  | 36  | 50  | 10  | 38  | 46  | 66  | 17  |
| 7            | 50  | 52  | 34  | 54  | 69  | 44  | 100 | 28  | 60  | 36  | 18  | 34  | 66  | 78  | 47  | 44  |
| 8            | -14 | 4   | 70  | 16  | 19  | 9   | 28  | 100 | 17  | -34 | -16 | -31 | -4  | 33  | 18  | 41  |
| 9            | 50  | 70  | 36  | 67  | 73  | 46  | 60  | 17  | 100 | 21  | 23  | 39  | 74  | 86  | 70  | 57  |
| 10           | 51  | 23  | -8  | -8  | 52  | 36  | 36  | -34 | 21  | 100 | 52  | 19  | 50  | 29  | 52  | -21 |
| 11           | 34  | 10  | 34  | -3  | 28  | 50  | 18  | -16 | 23  | 52  | 100 | 17  | 31  | 13  | 48  | -8  |
| 12           | 54  | 41  | -16 | 28  | 42  | 10  | 34  | -31 | 39  | 19  | 17  | 100 | 69  | 48  | 44  | 17  |
| 13           | 67  | 77  | 26  | 63  | 78  | 38  | 66  | -4  | 74  | 50  | 31  | 69  | 100 | 82  | 71  | 40  |
| 14           | 57  | 69  | 39  | 67  | 83  | 46  | 78  | 33  | 86  | 29  | 13  | 48  | 82  | 100 | 78  | 53  |
| 15           | 60  | 49  | 26  | 27  | 73  | 66  | 47  | 18  | 70  | 52  | 48  | 44  | 71  | 78  | 100 | 16  |
| 16           | 13  | 39  | 44  | 53  | 26  | 17  | 44  | 41  | 57  | -21 | -8  | 17  | 40  | 53  | 16  | 100 |

This matrix represents the correlation of rankings among all 16 participants. The numbers 1 to 16 displayed horizontally (rows) and vertically (columns) correspond to unique participants.

Supplementary material 3: Factor arrays per perspective

The factor arrays shown below depict the position on the score sheet for each statement for each perspective.

Perspective 1 – clinical needs and outcomes

| -4                                                                               | -3                                                                                   | -2                                                                                  | -1                                                                                                   | 0                                                                         | 1                                                                                                            | 2                                                                   | 3                                                                                                          | 4                                                                      |
|----------------------------------------------------------------------------------|--------------------------------------------------------------------------------------|-------------------------------------------------------------------------------------|------------------------------------------------------------------------------------------------------|---------------------------------------------------------------------------|--------------------------------------------------------------------------------------------------------------|---------------------------------------------------------------------|------------------------------------------------------------------------------------------------------------|------------------------------------------------------------------------|
| 18. Patients who have contributed significantly in society should be prioritized | 14. Patients who currently have an important societal function should be prioritized | 15. Patients who depend heavily on others for care should be prioritized            | 16. Informal carers should be prioritized                                                            | 7. Young patients should be prioritized (in comparison to older patients) | 19. Doctors should be the ones to judge which patients get priority on the basis of their medical expertise. | 6. Patients that are clinically deteriorating should be prioritized | 10. Priority should be based on how many lives can be saved                                                | 3. Patients with the greatest need for treatment should be prioritized |
|                                                                                  | 8. Patients with a healthy lifestyle should be prioritized                           | 17. It is important when prioritizing that people can fulfill their role in society | 2. Allocation of a surgery should be based on a first come, first served system                      | 20. Patients should have a voice in who gets prioritized                  | 12. Priority should be based on the best prognosis of the patient after treatment                            | 11. Priority should be based on how many life-years can be saved    | 9. Priority should be given to those treatments that generate the most overall health for the most people. |                                                                        |
|                                                                                  |                                                                                      |                                                                                     | 1. Allocation of a surgery should be based on a lottery, everyone has an equal chance to get surgery | 13. Patients who are healthcare professionals should be prioritized       | 5. Patients with the lowest quality of life should be prioritized                                            |                                                                     |                                                                                                            |                                                                        |
|                                                                                  |                                                                                      |                                                                                     |                                                                                                      | 4. Patients with the worst health status should be prioritized            |                                                                                                              |                                                                     |                                                                                                            |                                                                        |

Perspective 2 – population outcomes and contribution to society

| -4                                                                              | -3                                                                                                   | -2                                                                | -1                                                                                   | 0                                                                      | 1                                                                         | 2                                                                                                            | 3                                                                                   | 4                                                                                                          |
|---------------------------------------------------------------------------------|------------------------------------------------------------------------------------------------------|-------------------------------------------------------------------|--------------------------------------------------------------------------------------|------------------------------------------------------------------------|---------------------------------------------------------------------------|--------------------------------------------------------------------------------------------------------------|-------------------------------------------------------------------------------------|------------------------------------------------------------------------------------------------------------|
| 2. Allocation of a surgery should be based on a first come, first served system | 18. Patients who have contributed significantly in society should be prioritized                     | 5. Patients with the lowest quality of life should be prioritized | 4. Patients with the worst health status should be prioritized                       | 6. Patients that are clinically deteriorating should be prioritized    | 11. Priority should be based on how many life-years can be saved          | 10. Priority should be based on how many lives can be saved                                                  | 12. Priority should be based on the best prognosis of the patient after treatment   | 9. Priority should be given to those treatments that generate the most overall health for the most people. |
|                                                                                 | 1. Allocation of a surgery should be based on a lottery, everyone has an equal chance to get surgery | 16. Informal carers should be prioritized                         | 14. Patients who currently have an important societal function should be prioritized | 8. Patients with a healthy lifestyle should be prioritized             | 20. Patients should have a voice in who gets prioritized                  | 19. Doctors should be the ones to judge which patients get priority on the basis of their medical expertise. | 17. It is important when prioritizing that people can fulfill their role in society |                                                                                                            |
|                                                                                 |                                                                                                      |                                                                   | 15. Patients who depend heavily on others for care should be prioritized             | 13. Patients who are healthcare professionals should be prioritized    | 7. Young patients should be prioritized (in comparison to older patients) |                                                                                                              |                                                                                     |                                                                                                            |
|                                                                                 |                                                                                                      |                                                                   |                                                                                      | 3. Patients with the greatest need for treatment should be prioritized |                                                                           |                                                                                                              |                                                                                     |                                                                                                            |
